# Supplementary material
Source: HighWire-hosted journal article supplement (https://bmjopen.bmj.com/content/8/4/e021100)
Supplement: inline-supplementary-material-2 [file inline-supplementary-material-2.pdf]

## Supplementary Document 2

### Data extraction form

|               |  |
|---------------|--|
| Reviewer Name |  |
| Review Date   |  |
| STUDY         |  |
| First author  |  |
| Year          |  |

### STUDY CHARACTERISTICS

|                     | Response | Notes |
|---------------------|----------|-------|
| Setting             |          |       |
| Country             |          |       |
| Study Design        |          |       |
| Period of Study     |          |       |
| Aims and Objectives |          |       |

### POPULATION and COMPARATOR

| POPULATION                                                                    | Response                                                    | Notes                                                                                  |
|-------------------------------------------------------------------------------|-------------------------------------------------------------|----------------------------------------------------------------------------------------|
| Total number of participants                                                  |                                                             |                                                                                        |
| Total number of participants with T2D                                         |                                                             |                                                                                        |
| How was T2D defined or measured in this population?                           |                                                             |                                                                                        |
| How was the study population recruited?                                       |                                                             |                                                                                        |
| What were the sampling methods? Explain                                       |                                                             |                                                                                        |
| Inclusion criteria for study population                                       |                                                             |                                                                                        |
| Exclusion criteria for study population                                       |                                                             |                                                                                        |
| COMPARATOR                                                                    |                                                             |                                                                                        |
| Was there data on people with T2D with no other chronic condition (only T2D)? | <input type="checkbox"/> Yes<br><input type="checkbox"/> No | If yes, please fill in both columns of table 1.<br>If no only fill in the left column. |
| Total number of participants with T2D                                         |                                                             |                                                                                        |

|                                        |  |  |
|----------------------------------------|--|--|
| <b>with no other chronic condition</b> |  |  |
|----------------------------------------|--|--|

Table 1: Characteristics of those with and without type 2 diabetes

| <b>Characteristics</b>                                                                                                                        | <b>T2D population<br/>n =</b> | <b>T2D Only (T2D with no other conditions – control group)<br/>n =</b> |
|-----------------------------------------------------------------------------------------------------------------------------------------------|-------------------------------|------------------------------------------------------------------------|
| Age, mean (SD)                                                                                                                                |                               |                                                                        |
| Female sex, N (%)                                                                                                                             |                               |                                                                        |
| Ethnicity, N (%) <ul style="list-style-type: none"> <li>- Caucasian</li> <li>- Etc.</li> </ul>                                                |                               |                                                                        |
| Social economic status <ul style="list-style-type: none"> <li>-</li> </ul>                                                                    |                               |                                                                        |
| Occupation <ul style="list-style-type: none"> <li>-</li> </ul>                                                                                |                               |                                                                        |
| Education <ul style="list-style-type: none"> <li>-</li> </ul>                                                                                 |                               |                                                                        |
| Diabetes duration, mean (SD)                                                                                                                  |                               |                                                                        |
| HbA1c, mean (SD)                                                                                                                              |                               |                                                                        |
| Body mass index, kg/m <sup>2</sup> , mean (SD)                                                                                                |                               |                                                                        |
| Insulin treated, N (%)                                                                                                                        |                               |                                                                        |
| Oral anti-diabetes drugs, N(%) <ul style="list-style-type: none"> <li>- None</li> <li>- One</li> <li>- Two or more</li> <li>- Etc.</li> </ul> |                               |                                                                        |

## EXPOSURE

|                                                          | Response | Notes |
|----------------------------------------------------------|----------|-------|
| How was multimorbidity count defined in this population? |          |       |
| List the conditions included for multimorbidity count    |          |       |

Table 2: Multimorbidity characteristics of those with type 2 diabetes

Adjust table where necessary, i.e. if multimorbidity is measured in terms of Charlson Comorbidity Index (CCI) – adjust table to show different CCI scores.

| Multimorbidity Characteristics            | Number of people with MM characteristic recorded<br>n = |
|-------------------------------------------|---------------------------------------------------------|
| Multimorbidity count                      |                                                         |
| 0 comorbidity, N (%)                      |                                                         |
| 1 comorbidity, N (%)                      |                                                         |
| 2 comorbidities, N (%)                    |                                                         |
| 3 comorbidities, N (%)                    |                                                         |
| 4 comorbidities, N (%)                    |                                                         |
| 5 comorbidities, N (%)                    |                                                         |
| 6+ comorbidities, N (%)                   |                                                         |
|                                           |                                                         |
| Comorbid conditions                       |                                                         |
| e.g. Hypertension, N(%)                   |                                                         |
| e.g. Cardiovascular disease, N(%)         |                                                         |
|                                           |                                                         |
|                                           |                                                         |
| Add additional columns and rows if needed |                                                         |

## OUTCOMES

### MORTALITY OUTCOME:

|                                                                                                               | Response                                                    | Notes |
|---------------------------------------------------------------------------------------------------------------|-------------------------------------------------------------|-------|
| Is all-cause mortality an outcome?                                                                            | <input type="checkbox"/> Yes<br><input type="checkbox"/> No |       |
| How was all-cause mortality measured?                                                                         |                                                             |       |
| Statistical analysis; How was the relationship between multimorbidity count and all-cause mortality explored? |                                                             |       |
| Length of follow up                                                                                           |                                                             |       |

Table 3: Hazard ratios and 95% Confidence Interval (reword if MM count and mortality relationship explored differently) for effect of MM count on Mortality in people with T2D

Adjust table where necessary, i.e. if multimorbidity is measured in terms of Charlson Comorbidity Index (CCI) – adjust table to show different CCI scores.

| Multimorbidity Characteristics | HR (95% CI) |
|--------------------------------|-------------|
| Multimorbidity count           |             |
| 0 comorbidity                  |             |
| 1 comorbidity                  |             |
| 2 comorbidities                |             |
| 3 comorbidities                |             |
| 4 comorbidities                |             |
| 5 comorbidities                |             |
| 6+ comorbidities               |             |
|                                |             |
| Comorbid conditions            |             |
| e.g. Hypertension              |             |
| e.g. Cardiovascular disease    |             |
|                                |             |

What variables were adjusted in the statistical analysis?: \_\_\_\_

GLYCAEMIC OUTCOME:

|                                                                                                     | Response                                                                                                                                                                                                                                                        | Notes                                                                     |
|-----------------------------------------------------------------------------------------------------|-----------------------------------------------------------------------------------------------------------------------------------------------------------------------------------------------------------------------------------------------------------------|---------------------------------------------------------------------------|
| Are any measures of glycaemia an outcome?                                                           | <input type="checkbox"/> Yes<br><input type="checkbox"/> No                                                                                                                                                                                                     |                                                                           |
| How was glycaemia measured?                                                                         | <input type="checkbox"/> HbA1c<br><input type="checkbox"/> Fasting plasma glucose<br><input type="checkbox"/> Hypoglycaemic event<br><input type="checkbox"/> Hyperglycaemic event<br><input type="checkbox"/> Any measure of glycaemic variability<br>Explain: |                                                                           |
| Statistical analysis; How was the relationship between multimorbidity count and glycaemia explored? |                                                                                                                                                                                                                                                                 |                                                                           |
| What was glycaemic outcome treated as                                                               | <input type="checkbox"/> Continuous outcome<br><input type="checkbox"/> Categorical outcome<br><input type="checkbox"/> Both<br>Explain:                                                                                                                        |                                                                           |
| Length of follow up                                                                                 |                                                                                                                                                                                                                                                                 | this may not be applicable as we are only looking at cross sectional data |

If glycaemic outcome is measured as a continuous variable use this: ☐ Yes ☐ No

Table 4: Estimated mean change,  $\beta$ 1 and 95% Confidence Interval, in HbA1c (reword if MM count and glycaemia relationship measured differently) for effect of MM count on glycaemia (measured in HbA1c) in people with T2D

Or

If glycaemic outcome is measured as a categorical variable use this: ☐ Yes ☐ No

Table 4: Odds ratios and 95% Confidence Interval (reword if MM count and glycaemia relationship measured differently) for effect of MM count on glycaemia (if measured in OR, glycaemia most likely measured in hypoglycaemic/hyperglycaemic events) in people with T2D

Adjust table where necessary, i.e. if multimorbidity is measured in terms of Charlson Comorbidity Index (CCI) – adjust table to show different CCI scores.

|                                | Reviewer uses 1 of the columns below depending on whether glycaemic outcome is measured as continuous or categorical |         |                             |         |
|--------------------------------|----------------------------------------------------------------------------------------------------------------------|---------|-----------------------------|---------|
| Multimorbidity Characteristics | Continuous:<br>Estimated mean change, $\beta$ 1 (95% CI)                                                             | p-value | Categorical:<br>OR (95% CI) | p-value |
| Multimorbidity count           |                                                                                                                      |         |                             |         |
| 0 comorbidity, N (%)           |                                                                                                                      |         |                             |         |
| 1 comorbidity, N (%)           |                                                                                                                      |         |                             |         |
| 2 comorbidities, N (%)         |                                                                                                                      |         |                             |         |
| 3 comorbidities, N (%)         |                                                                                                                      |         |                             |         |
| 4 comorbidities, N (%)         |                                                                                                                      |         |                             |         |
| 5 comorbidities, N (%)         |                                                                                                                      |         |                             |         |

|                                      |  |  |  |  |
|--------------------------------------|--|--|--|--|
| 6+ comorbidities, N (%)              |  |  |  |  |
|                                      |  |  |  |  |
| Comorbid conditions                  |  |  |  |  |
| e.g. Hypertension, N(%)              |  |  |  |  |
| e.g. Cardiovascular disease,<br>N(%) |  |  |  |  |
|                                      |  |  |  |  |
|                                      |  |  |  |  |
|                                      |  |  |  |  |

**What variables were adjusted in the statistical analysis?:** \_\_\_\_

## OTHER

|                                                      | Response                                                              | Notes |
|------------------------------------------------------|-----------------------------------------------------------------------|-------|
| <b>Was there missing data?</b><br><b>Explanation</b> | <input type="checkbox"/> Yes, explain:<br><input type="checkbox"/> No |       |
| <b>Attrition?</b><br><b>Explanation:</b>             | <input type="checkbox"/> Yes, explain:<br><input type="checkbox"/> No |       |
| <b>Authors' conclusion</b>                           |                                                                       |       |
| <b>Miscellaneous comments</b>                        |                                                                       |       |
| <b>Funding source</b>                                |                                                                       |       |
| <b>Other</b>                                         |                                                                       |       |
| <b>Additional notes</b>                              |                                                                       |       |
